# Supplementary material for: Clumped-isotope-derived climate trends leading up to the end-Cretaceous mass extinction in northwest Europe
Source: Copernicus journal article supplement (doi:10.5194/cp-2021-104), 2021-09-09
Supplement: Supplementary file [file cp-2021-104-AC5-supplement.pdf]

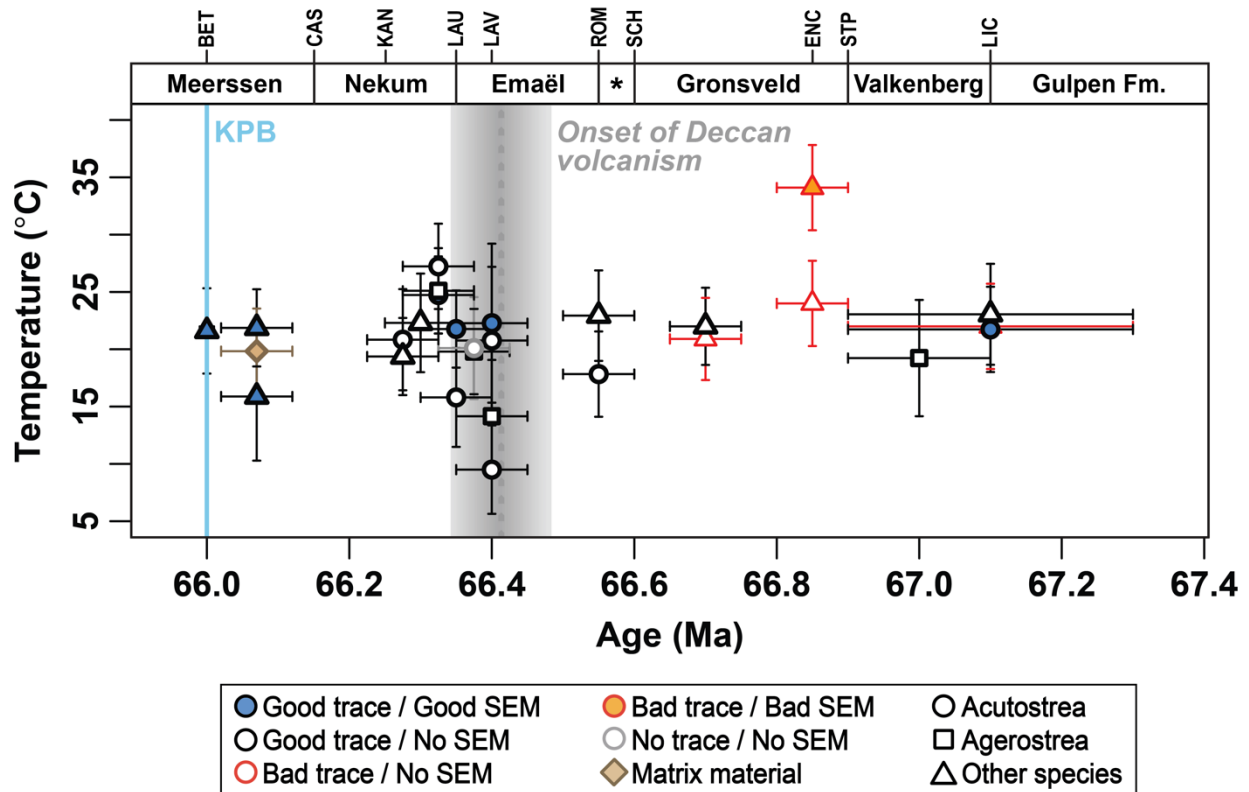

Figure showing clumped-isotope-based temperatures for all samples. Red samples have not passed screening and were not interpreted further, although the close agreement between these temperatures and those of other well-preserved samples from the same horizons suggests our screening criteria are quite conservative. Compared to the older version of this figure, a few new points have been added, error bars have been added in the x-direction to show uncertainty in age model at different horizons. Uncertainty in the timing of the onset of Deccan volcanism has been indicated by grey shading. This date represents the oldest radiometric date of Deccan lavas (Sprain et al., 2019)
